# Supplementary material for: Effects of Exhaustive Aerobic Exercise on Tryptophan-Kynurenine Metabolism in Trained Athletes
Source: PubMed Central journal article supplement (PMC4849644; doi:10.1371/journal.pone.0153617), 2016-04-28
Supplement: pone.0153617.s001.pdf [file pone.0153617.s001.pdf]

# Strasser

12.03.2015

|     | Allergosan |   |     | 1=m/2=fm |      |
|-----|------------|---|-----|----------|------|
| Rot | Pr.Nr.     |   | Age | Sex      | BMI  |
| 1   | CS-1-B-1   | B | 24  | 2        | 20,6 |
| 2   | FM-2-B-1   | B | 32  | 1        | 21,9 |
| 3   | SN-3-B-1   | B | 21  | 1        | 22,4 |
| 4   | SS-4-B-1   | B | 24  | 2        | 24,3 |
| 5   | MG-5-B-1   | B | 31  | 1        | 24,4 |
| 6   | DL-6-B-1   | B | 22  | 1        | 23,3 |
| 7   | FS-7-B-1   | B | 22  | 1        | 25,5 |
| 8   | CB-8-B-1   | B | 25  | 2        | 21,2 |
| 9   | TW-9-B-1   | B | 26  | 1        | 21,3 |
| 10  | PB-10-B-1  | B | 34  | 1        | 23,3 |
| 11  | CF-11-B-1  | B | 28  | 2        | 18,6 |
| 12  | JS-12-B-1  | B | 26  | 1        | 23,4 |
| 13  | CLS-13-B-1 | B | 27  | 2        | 22,9 |
| 14  | MS-14-B-1  | B | 28  | 1        | 25,3 |
| 15  | PW-15-B-1  | B | 25  | 1        | 22,7 |
| 16  | AG-16-B-1  | B | 28  | 2        | 22,6 |
| 17  | LW-17-B-1  | B | 27  | 2        | 22,1 |
| 18  | AR-18-B-1  | B | 23  | 1        | 23,2 |
| 19  | TB-19-B-1  | B | 25  | 2        | 21,8 |
| 20  | IB-20-B-1  | B | 25  | 2        | 17,0 |
| 21  | FF-21-B-1  | B | 32  | 1        | 25,4 |
| 22  | VM-22-B-1  | B | 28  | 2        | 19,9 |
| 23  | TR-23-B-1  | B | 24  | 2        | 20,9 |
| 24  | MM-24-B-1  | B | 31  | 2        | 21,7 |
| 25  | MAS-25-B-1 | B | 20  | 2        | 19,1 |
| 26  | IF-26-B-1  | B | 31  | 1        | 22,5 |
| 27  | SM-27-B-1  | B | 31  | 2        | 19,6 |
| 28  | CK-28-B-1  | B | 24  | 1        | 21,6 |
| 29  | KK-29-B-1  | B | 30  | 2        | 19,6 |
| 30  | BH-30-B-1  | B | 25  | 1        | 22,1 |
| 31  | MH-31-B-1  | B | 25  | 2        | 20,7 |
| 32  | SK-32-B-1  | B | 23  | 2        | 19,3 |
| 33  | RL-33-B-1  | B | 35  | 1        | 24,4 |

| Blau |          |   |    |   |      |
|------|----------|---|----|---|------|
| 1    | CS-1-E-1 | E | 24 | 2 | 20,6 |
| 2    | FM-2-E-1 | E | 32 | 1 | 21,9 |
| 3    | SN-3-E-1 | E | 21 | 1 | 22,4 |
| 4    | SS-4-E-1 | E | 24 | 2 | 24,3 |
| 5    | MG-5-E-1 | E | 31 | 1 | 24,4 |
| 6    | DL-6-E-1 | E | 22 | 1 | 23,3 |

|    |            |   |    |   |      |
|----|------------|---|----|---|------|
| 7  | FS-7-E-1   | E | 22 | 1 | 25,5 |
| 8  | CB-8- E-1  | E | 25 | 2 | 21,2 |
| 9  | TW-9-E-1   | E | 26 | 1 | 21,3 |
| 10 | PB-10-E-1  | E | 34 | 1 | 23,3 |
| 11 | CF-11-E-1  | E | 28 | 2 | 18,6 |
| 12 | JS-12-E-1  | E | 26 | 1 | 23,4 |
| 13 | CLS-13-E-1 | E | 27 | 2 | 22,9 |
| 14 | MS-14-E-1  | E | 28 | 1 | 25,3 |
| 15 | PW-15-E-1  | E | 25 | 1 | 22,7 |
| 16 | AG-16-E-1  | E | 28 | 2 | 22,6 |
| 17 | LW-17-E-1  | E | 27 | 2 | 22,1 |
| 18 | AR-18-E-1  | E | 23 | 1 | 23,2 |
| 19 | TB-19-E-1  | E | 25 | 2 | 21,8 |
| 20 | IB-20-E-1  | E | 25 | 2 | 17,0 |
| 21 | FF-21-E-1  | E | 32 | 1 | 25,4 |
| 22 | VM-22-E-1  | E | 28 | 2 | 19,9 |
| 23 | TR-23-E-1  | E | 24 | 2 | 20,9 |
| 24 | MM-24-E-1  | E | 31 | 2 | 21,7 |
| 25 | MAS-25-E-1 | E | 20 | 2 | 19,1 |
| 26 | IF-26-E-1  | E | 31 | 1 | 22,5 |
| 27 | SM-27-E-1  | E | 31 | 2 | 19,6 |
| 28 | CK-28-E-1  | E | 24 | 1 | 21,6 |
| 29 | KK-29-E-1  | E | 30 | 2 | 19,6 |
| 30 | BH-30-E-1  | E | 25 | 1 | 22,1 |
| 31 | MH-31-E-1  | E | 25 | 2 | 20,7 |
| 32 | SK-32-E-1  | E | 23 | 2 | 19,3 |
| 33 | RL-33-E-1  | E | 35 | 1 | 24,4 |

| ml/kg/min | W/kg | h/wk           | h/wk        | Watt | mmol/l | nmol/L    |
|-----------|------|----------------|-------------|------|--------|-----------|
| VO2max    | Wmax | Training (pre) | WNTZ (post) | TT   | Lac    | Neopterin |
| 36,9      | 3,60 | 6              | 2,92        |      |        | 4,7       |
| 40,2      | 3,80 | 9              | 6,12        |      |        | 4,7       |
| 66,2      | 5,10 | 10             | 9,27        |      |        | 4,5       |
| 56,1      | 4,90 | 15             | 7,10        |      |        | 4,6       |
| 53,7      | 4,60 |                |             |      |        | 14,0      |
| 57,8      | 4,60 | 10             | 9,42        |      |        | 4,9       |
| 48,2      | 4,00 | 7              | 4,62        |      |        | 4,8       |
| 52,8      | 4,70 | 6              | 6,13        |      |        | 4,6       |
| 64,0      | 5,40 | 15             | 3,97        |      |        | 6,4       |
| 58,0      | 4,70 | 15             | 13,40       |      |        | 4,9       |
| 50,2      | 4,60 | 6              | 8,57        |      |        | 4,9       |
| 59,4      | 4,80 | 15             | 8,88        |      |        | 4,7       |
| 48,3      | 4,20 | 8              | 6,45        |      |        | 5,9       |
| 50,9      | 4,30 | 10             | 9,15        |      |        | 4,0       |
| 60,7      | 4,80 | 10             | 9,37        |      |        | 4,9       |
| 47,4      | 4,50 | 15             | 5,67        |      |        | 4,8       |
| 45,9      | 4,40 | 10             | 5,30        |      |        | 6,4       |
| 50,3      | 5,30 | 8              | 5,45        |      |        | 6,1       |
| 39,9      | 3,70 |                |             |      |        | 10,9      |
| 39,2      | 3,80 | 6              | 3,93        |      |        | 12,5      |
| 52,0      | 4,60 |                |             |      |        | 6,2       |
| 49,3      | 5,20 | 8              | 8,37        |      |        | 7,2       |
| 45,6      | 4,80 | 10             | 5,77        |      |        | 10,1      |
| 57,4      | 4,90 | 30             | 21,00       |      |        | 5,3       |
| 45,5      | 4,20 | 6              | 4,30        |      |        | 4,6       |
| 50,3      | 4,30 | 20             | 5,40        |      |        | 16,3      |
| 48,1      | 4,70 | 20             | 10,83       |      |        | 4,4       |
| 63,3      | 5,20 | 14             | 6,30        |      |        | 4,1       |
| 44,3      | 4,50 | 6              | 5,33        |      |        | 6,4       |
| 59,1      | 5,20 | 15             | 6,57        |      |        | 5,0       |
| 41,0      | 4,00 | 15             | 6,67        |      |        | 5,4       |
| 49,1      | 4,40 | 6              | 5,28        |      |        | 5,0       |
| 64,1      | 5,20 |                |             |      |        | 8,0       |

|      |  |  |  |     |       |      |
|------|--|--|--|-----|-------|------|
| 36,9 |  |  |  | 141 | 9,6   | 14,0 |
| 40,2 |  |  |  | 175 | 10,33 | 4,9  |
| 66,2 |  |  |  | 248 | 11,08 | 8,5  |
| 56,1 |  |  |  | 213 | 9,49  | 5,3  |
| 53,7 |  |  |  | 273 | 12,24 | 21,4 |
| 57,8 |  |  |  | 257 | 11,35 | 7,6  |

|      |  |  |  |     |       |      |
|------|--|--|--|-----|-------|------|
| 48,2 |  |  |  | 216 | 7,05  | 4,8  |
| 52,8 |  |  |  | 169 | 9,73  | 7,1  |
| 64,0 |  |  |  | 251 | 11,71 | 16,7 |
| 58,0 |  |  |  | 248 | 8,01  | 4,9  |
| 50,2 |  |  |  | 173 | 11,43 | 6,8  |
| 59,4 |  |  |  | 256 | 14,4  | 11,8 |
| 48,3 |  |  |  | 176 | 6,8   | 9,0  |
| 50,9 |  |  |  | 255 | 11,61 | 4,4  |
| 60,7 |  |  |  | 273 | 10,01 | 4,7  |
| 47,4 |  |  |  | 166 | 14,27 | 4,8  |
| 45,9 |  |  |  | 169 | 10,72 | 16,4 |
| 50,3 |  |  |  | 247 | 14,4  | 8,1  |
| 39,9 |  |  |  | 139 | 3,63  | 13,3 |
| 39,2 |  |  |  | 117 | 8,12  | 22,5 |
| 52,0 |  |  |  | 237 | 6,72  | 9,3  |
| 49,3 |  |  |  | 177 | 14,01 | 14,5 |
| 45,6 |  |  |  | 194 | 10,53 | 13,7 |
| 57,4 |  |  |  | 185 | 10,25 | 7,3  |
| 45,5 |  |  |  | 139 | 12,01 | 9,2  |
| 50,3 |  |  |  | 200 | 9,29  | 20,5 |
| 48,1 |  |  |  | 170 | 10,48 | 4,9  |
| 63,3 |  |  |  | 229 | 10,69 | 4,6  |
| 44,3 |  |  |  | 162 | 11,42 | 11,4 |
| 59,1 |  |  |  | 274 | 13,51 | 7,2  |
| 41,0 |  |  |  | 173 | 12,7  | 9,1  |
| 49,1 |  |  |  | 164 | 10,11 | 10,5 |
| 64,1 |  |  |  | 290 | 11,94 | 16,6 |

4,58            11            7,29  
0,4780201    5,46788266    3,45

| $\mu\text{mol/L}$ | $\mu\text{mol/L}$ | $\mu\text{mol/mmol}$ | $\mu\text{mol/l}$ | $\mu\text{mol/l}$ | $\text{mol/mol}$ |
|-------------------|-------------------|----------------------|-------------------|-------------------|------------------|
| <b>Trp</b>        | <b>Kyn</b>        | <b>Kyn/Trp</b>       | <b>Tyr</b>        | <b>Phe</b>        | <b>Phe/Tyr</b>   |
| 58,4              | 1,29              | 22,1                 | 137,2             | 65,9              | 0,48             |
| 64,8              | 1,90              | 29,3                 | 143,8             | 69,3              | 0,48             |
| 70,1              | 2,08              | 29,6                 | 128,8             | 67,3              | 0,52             |
| 62,1              | 1,67              | 26,9                 | 142,2             | 57,3              | 0,40             |
| 53,0              | 2,14              | 40,3                 | 127,6             | 63,1              | 0,49             |
| 99,0              | 3,00              | 30,3                 | 116,0             | 70,9              | 0,61             |
| 49,5              | 1,21              | 24,4                 | 130,7             | 63,2              | 0,48             |
| 71,9              | 1,54              | 21,4                 | 155,1             | 68,0              | 0,44             |
| 71,9              | 2,33              | 32,4                 | 138,2             | 65,4              | 0,47             |
| 67,8              | 1,98              | 29,1                 | 118,8             | 66,1              | 0,56             |
| 52,7              | 1,47              | 27,9                 | 113,0             | 61,5              | 0,54             |
| 66,8              | 2,54              | 38,0                 | 175,8             | 70,1              | 0,40             |
| 50,5              | 1,68              | 33,3                 | 109,8             | 66,9              | 0,61             |
| 60,1              | 1,61              | 26,7                 | 116,6             | 76,0              | 0,65             |
| 87,7              | 1,91              | 21,7                 | 202,5             | 84,9              | 0,42             |
| 57,5              | 1,41              | 24,4                 | 146,7             | 67,7              | 0,46             |
| 59,1              | 1,70              | 28,7                 | 153,7             | 71,1              | 0,46             |
| 64,0              | 1,63              | 25,4                 | 161,4             | 82,1              | 0,51             |
| 51,1              | 1,74              | 34,1                 | 94,3              | 64,6              | 0,69             |
| 61,5              | 1,79              | 29,1                 | 89,7              | 57,5              | 0,64             |
| 65,6              | 1,97              | 30,0                 | 160,7             | 80,9              | 0,50             |
| 65,2              | 2,03              | 31,1                 | 151,0             | 75,5              | 0,50             |
| 63,2              | 2,05              | 32,4                 | 152,0             | 74,4              | 0,49             |
| 68,2              | 1,86              | 27,3                 | 159,5             | 92,1              | 0,58             |
| 68,2              | 1,66              | 24,4                 | 130,7             | 86,1              | 0,66             |
| 61,3              | 3,04              | 49,5                 | 107,4             | 60,4              | 0,56             |
| 65,7              | 1,55              | 23,6                 | 151,1             | 74,5              | 0,49             |
| 75,4              | 1,98              | 26,3                 | 124,1             | 70,9              | 0,57             |
| 65,6              | 2,01              | 30,7                 | 105,9             | 67,9              | 0,64             |
| 73,9              | 2,22              | 30,1                 | 117,9             | 59,4              | 0,50             |
| 59,2              | 1,41              | 23,7                 | 140,7             | 63,1              | 0,45             |
| 73,7              | 1,68              | 22,8                 | 87,0              | 57,2              | 0,66             |
| 63,4              | 1,96              | 31,0                 | 129,4             | 65,1              | 0,50             |

|      |      |      |       |      |      |
|------|------|------|-------|------|------|
| 50,9 | 1,41 | 27,7 | 140,9 | 57,9 | 0,41 |
| 57,8 | 2,20 | 38,0 | 121,2 | 58,6 | 0,48 |
| 51,2 | 2,10 | 41,0 | 159,5 | 68,5 | 0,43 |
| 59,7 | 1,92 | 32,1 | 135,5 | 57,6 | 0,42 |
| 46,1 | 2,61 | 56,7 | 137,9 | 67,1 | 0,49 |
| 54,5 | 1,73 | 31,8 | 134,3 | 66,1 | 0,49 |

|      |      |      |       |      |      |
|------|------|------|-------|------|------|
| 61,9 | 1,87 | 30,2 | 155,0 | 67,9 | 0,44 |
| 53,9 | 1,52 | 28,2 | 164,4 | 74,6 | 0,45 |
| 59,0 | 2,25 | 38,1 | 173,8 | 75,4 | 0,43 |
| 61,5 | 2,10 | 34,2 | 132,8 | 72,1 | 0,54 |
| 57,2 | 1,46 | 25,6 | 142,7 | 70,9 | 0,50 |
| 55,0 | 2,57 | 46,7 | 171,2 | 75,2 | 0,44 |
| 42,2 | 1,54 | 36,6 | 120,1 | 60,1 | 0,50 |
| 51,2 | 1,54 | 30,2 | 103,1 | 60,0 | 0,58 |
| 83,2 | 2,11 | 25,4 | 201,3 | 87,3 | 0,43 |
| 64,5 | 1,97 | 30,6 | 138,1 | 59,5 | 0,43 |
| 47,5 | 1,65 | 34,7 | 158,3 | 72,8 | 0,46 |
| 57,8 | 1,92 | 33,1 | 145,0 | 66,0 | 0,46 |
| 51,5 | 1,44 | 28,0 | 123,2 | 73,4 | 0,60 |
| 85,9 | 3,54 | 41,2 | 114,0 | 65,4 | 0,57 |
| 45,7 | 1,45 | 31,7 | 155,9 | 68,9 | 0,44 |
| 57,0 | 2,24 | 39,3 | 136,8 | 65,6 | 0,48 |
| 54,4 | 2,16 | 39,7 | 167,0 | 77,3 | 0,46 |
| 61,6 | 1,94 | 31,5 | 132,8 | 76,0 | 0,57 |
| 59,0 | 1,90 | 32,3 | 126,7 | 77,1 | 0,61 |
| 51,3 | 3,00 | 58,6 | 124,4 | 71,3 | 0,57 |
| 60,1 | 1,70 | 28,3 | 156,0 | 76,2 | 0,49 |
| 59,5 | 2,06 | 34,6 | 137,7 | 69,6 | 0,51 |
| 56,4 | 1,96 | 34,7 | 113,5 | 63,0 | 0,55 |
| 60,8 | 2,20 | 36,1 | 136,3 | 63,4 | 0,47 |
| 49,0 | 1,51 | 30,8 | 143,4 | 73,3 | 0,51 |
| 61,9 | 1,80 | 29,1 | 106,0 | 61,6 | 0,58 |
| 54,7 | 2,30 | 42,0 | 139,1 | 68,0 | 0,49 |
